# Supplementary material for: Maresin-1 Prevents Liver Fibrosis by Targeting Nrf2 and NF-κB, Reducing Oxidative Stress and Inflammation
Source: MDPI journal article supplement (doi:10.3390/cells10123406), 2021-12-03

# Supplementary

## S1: liver biopsies analysis

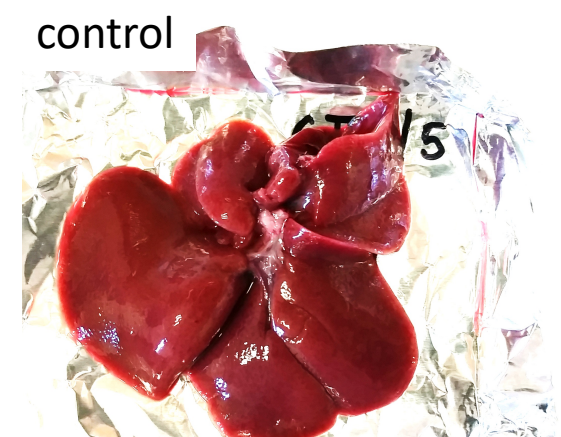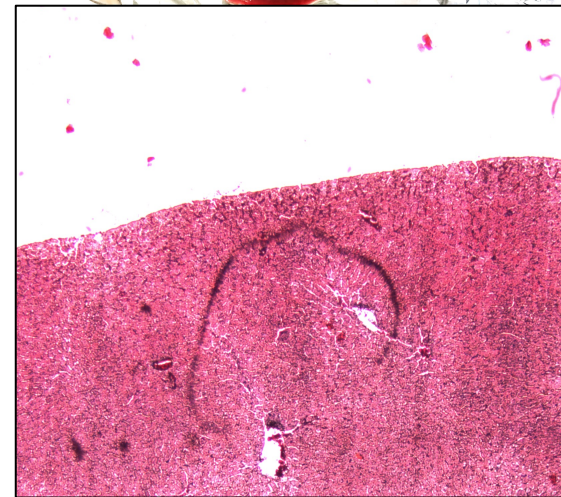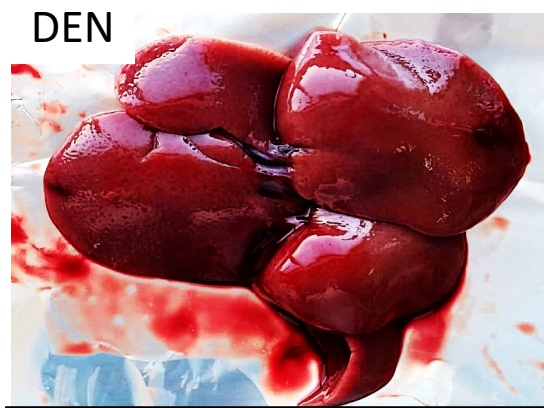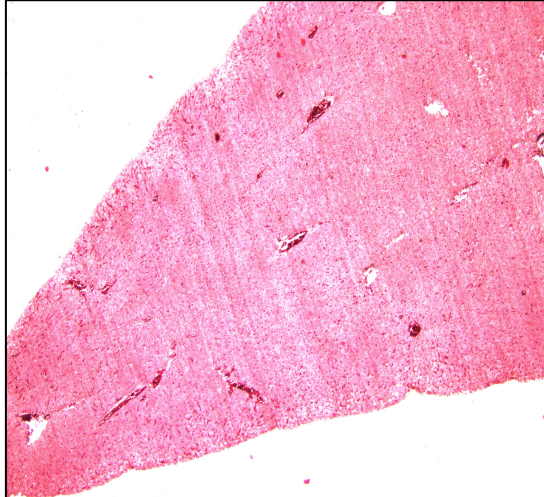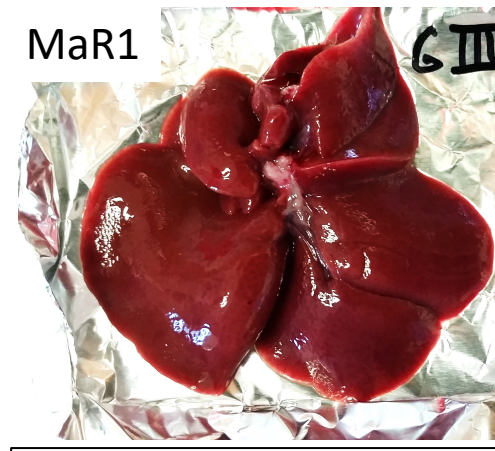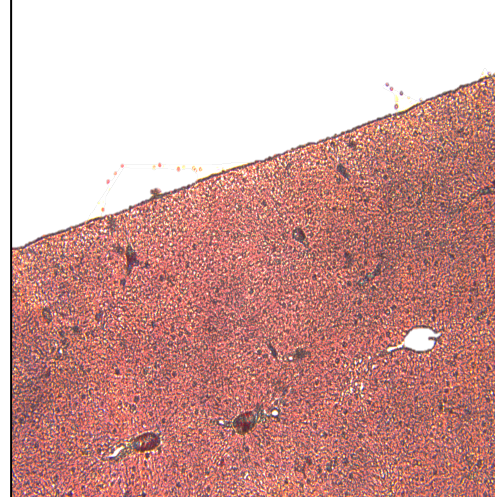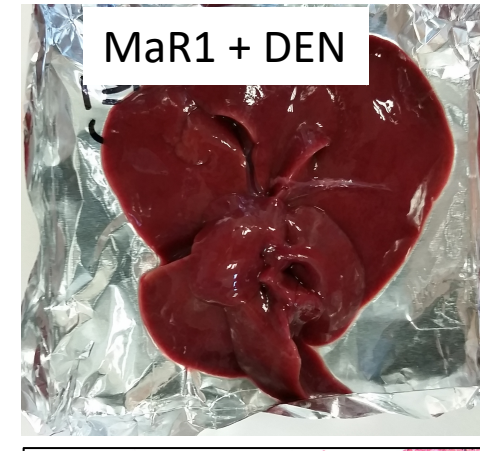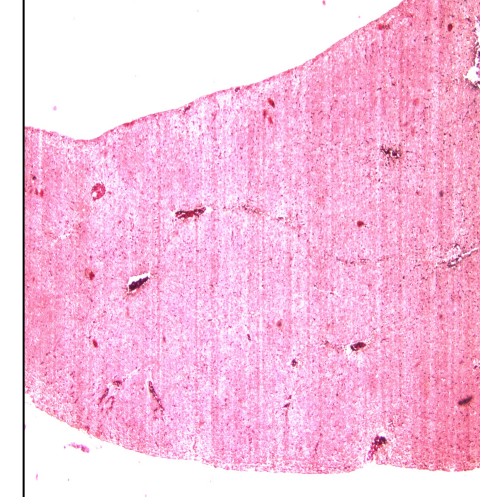



S2: Liver Van Gieson stain

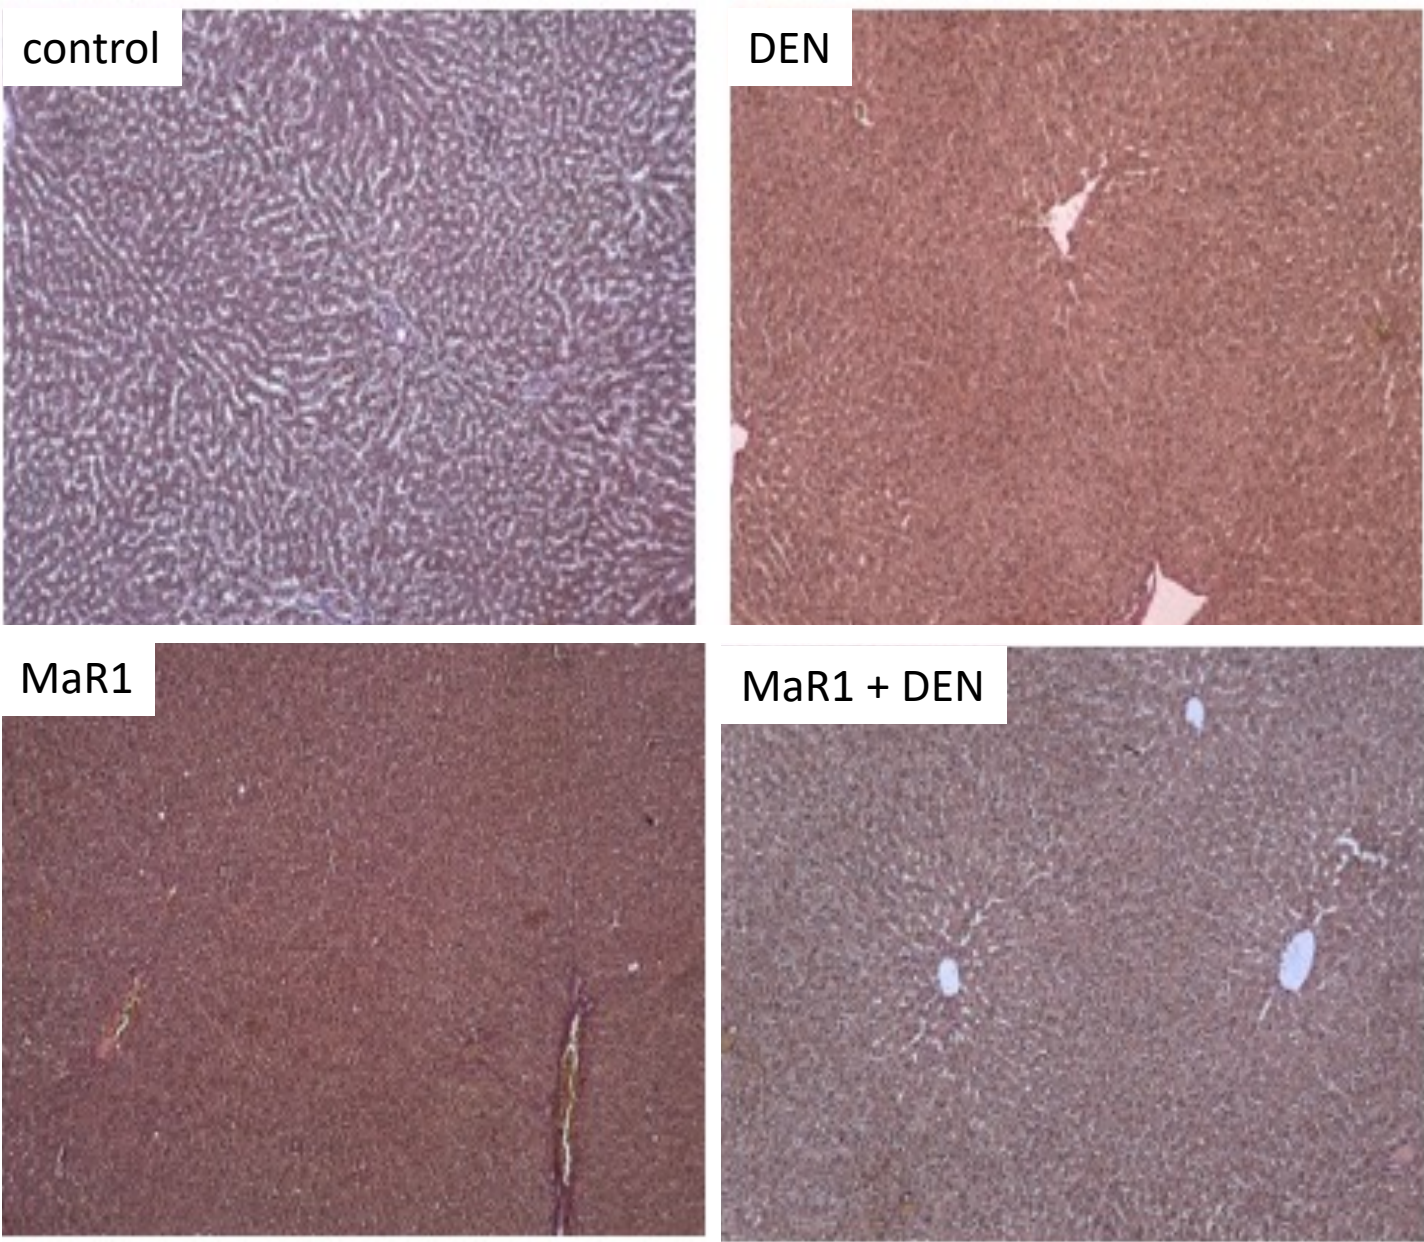

Van Gieson 100x.

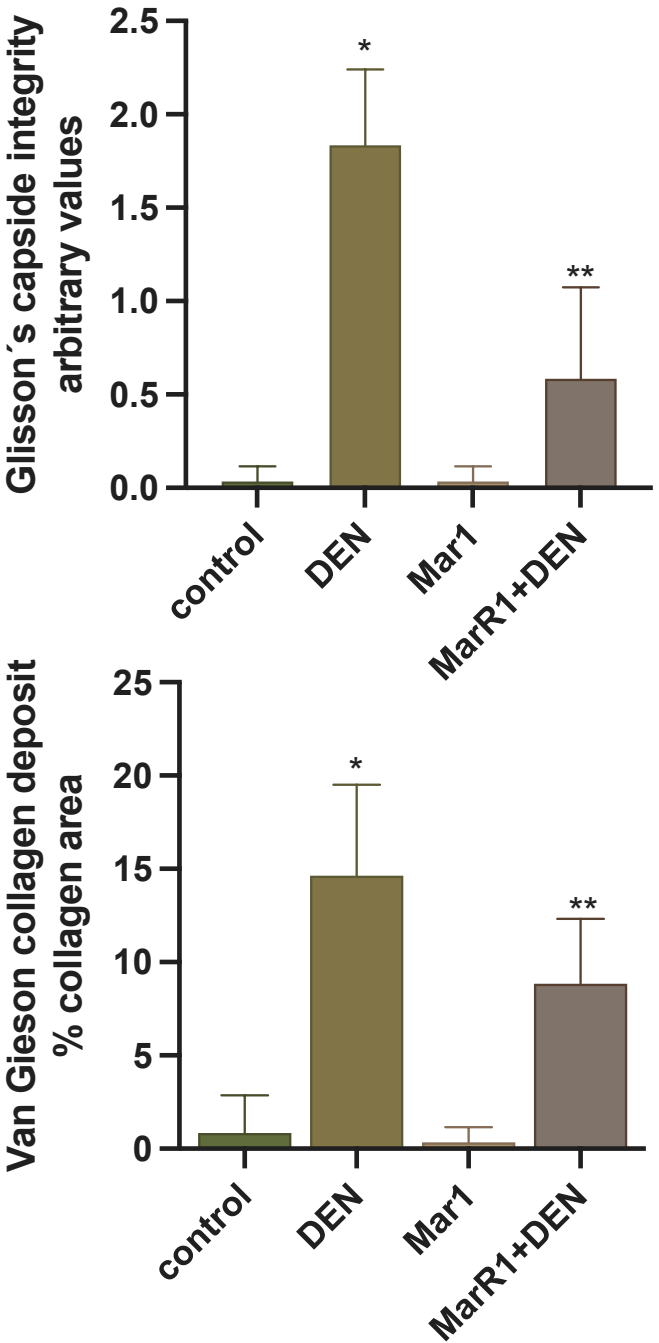

### S3: Liver Elastic Van Gieson stain

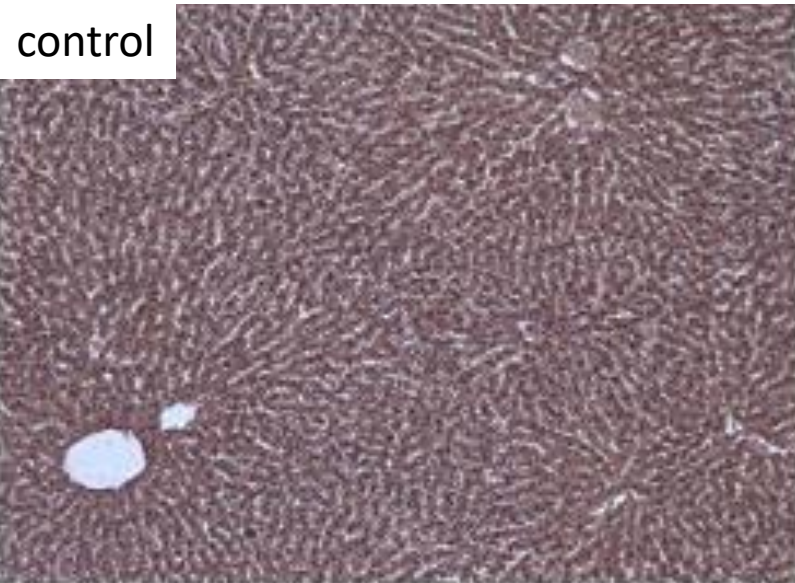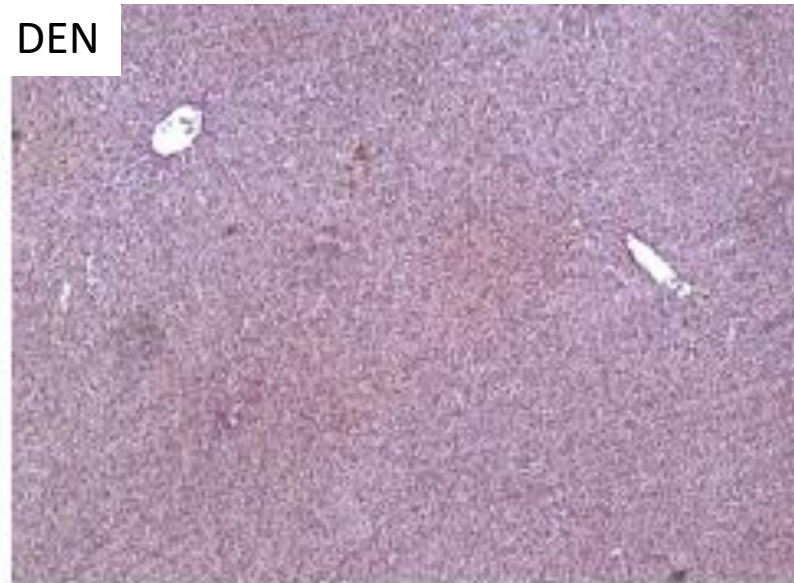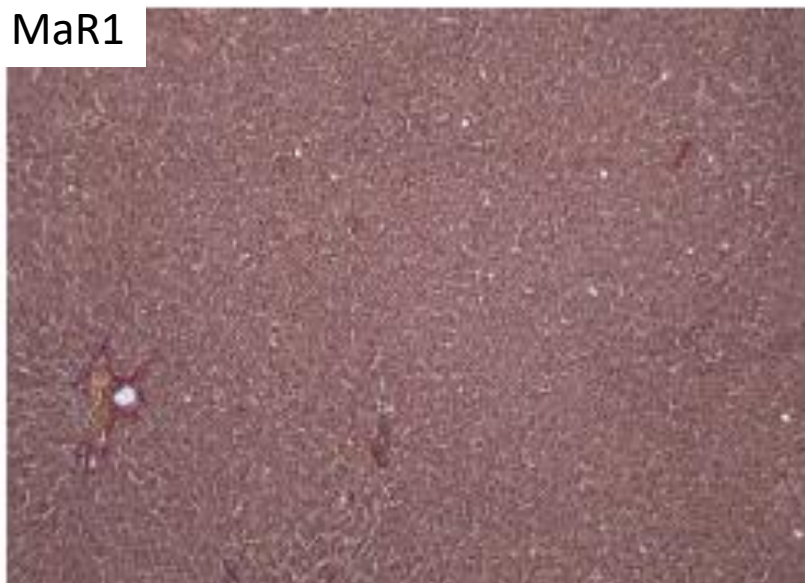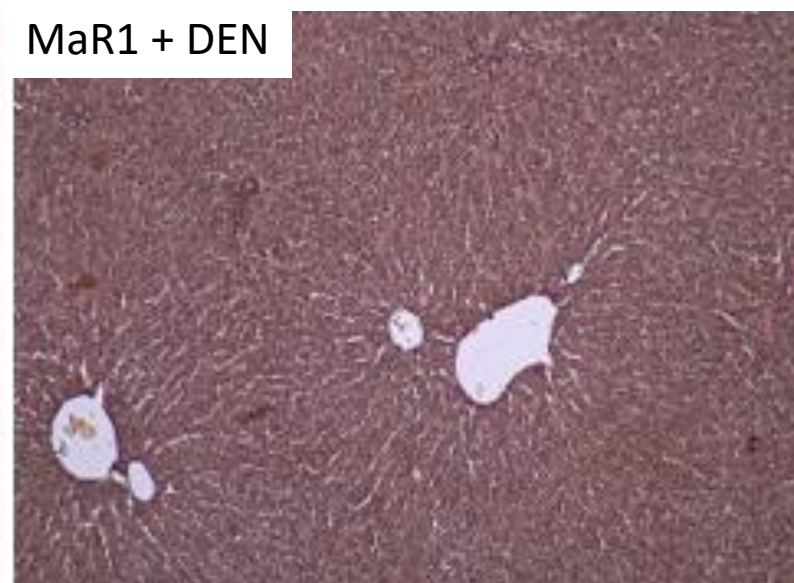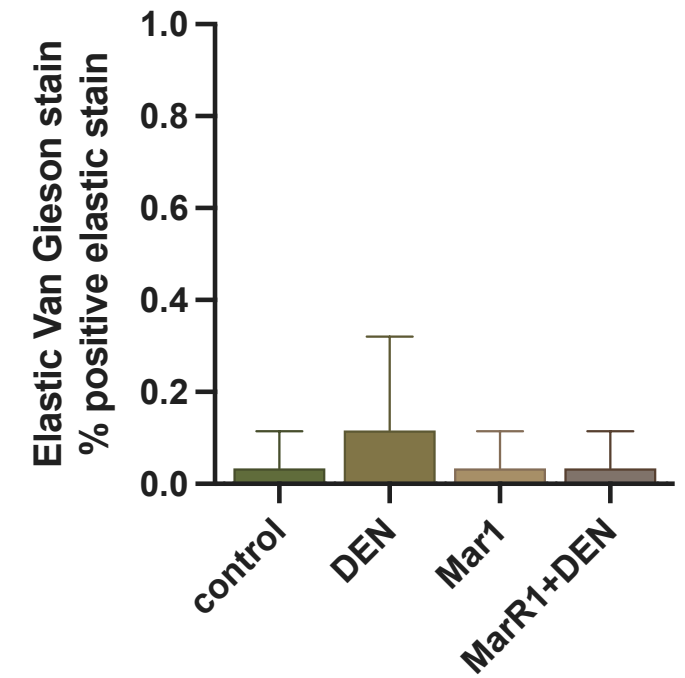

Elastic Van Gieson stain 100x



## S4: Liver Periodic-ácid Schiff (PAS)

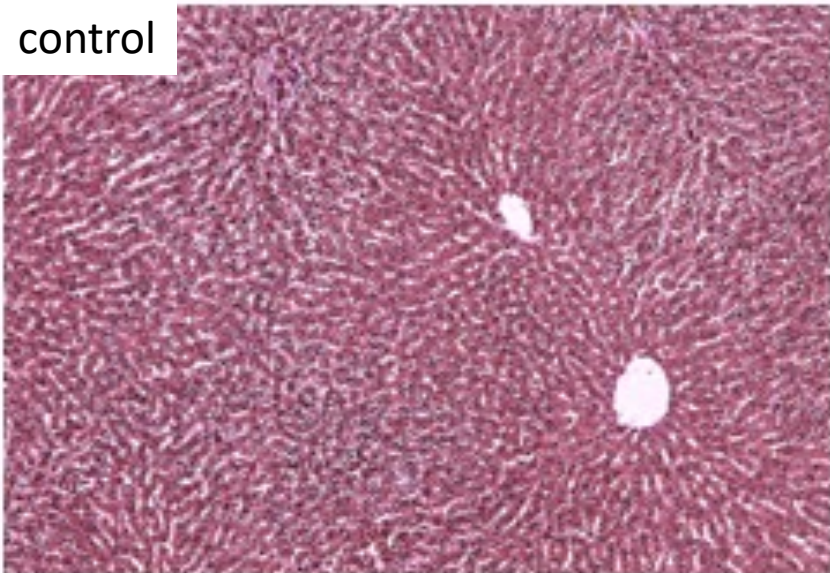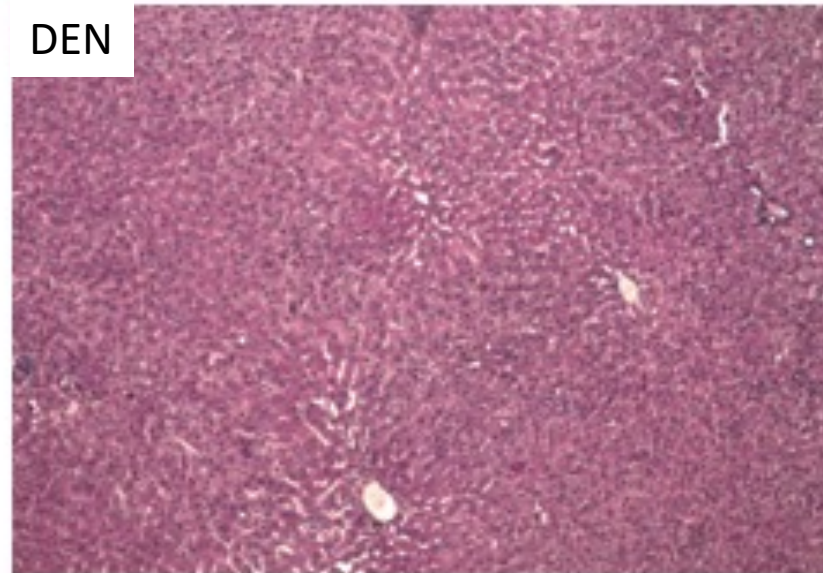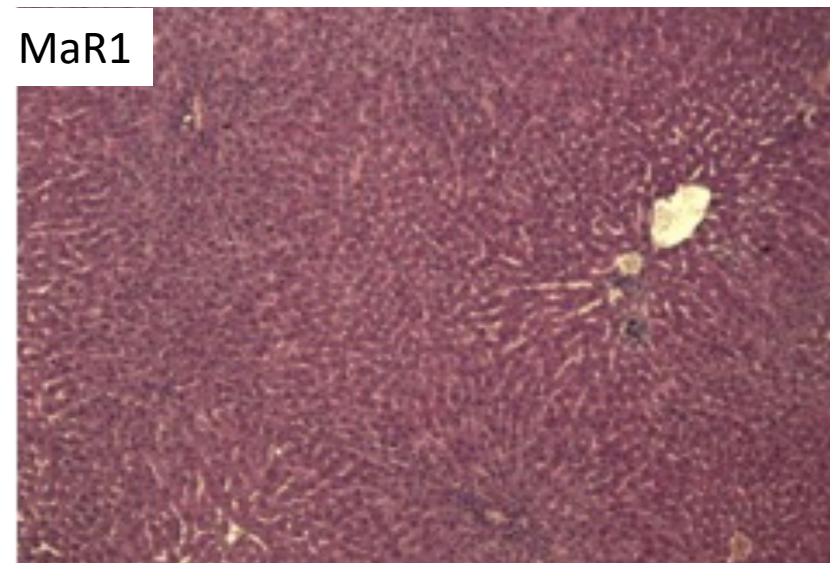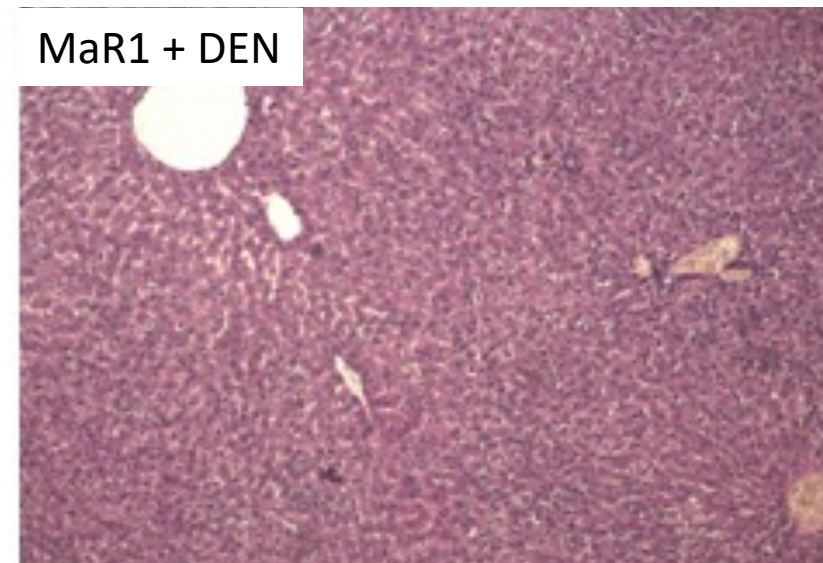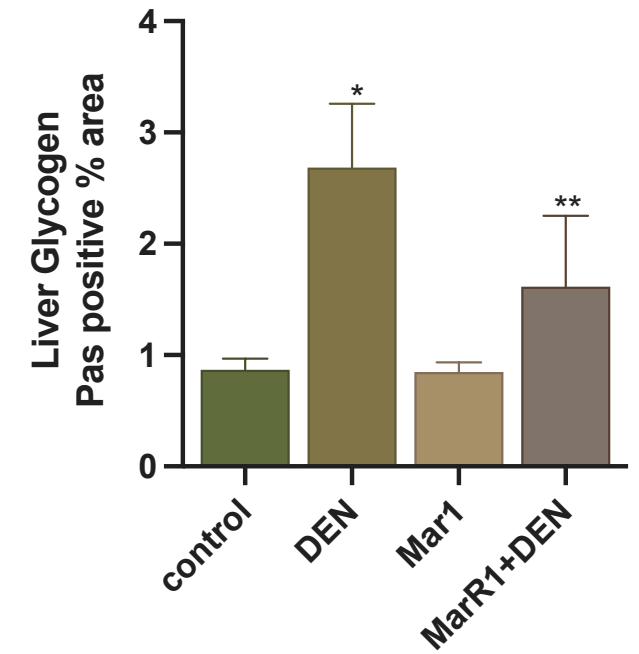

PAS stain 100x



S5: IκBα and p-IκBα western blot

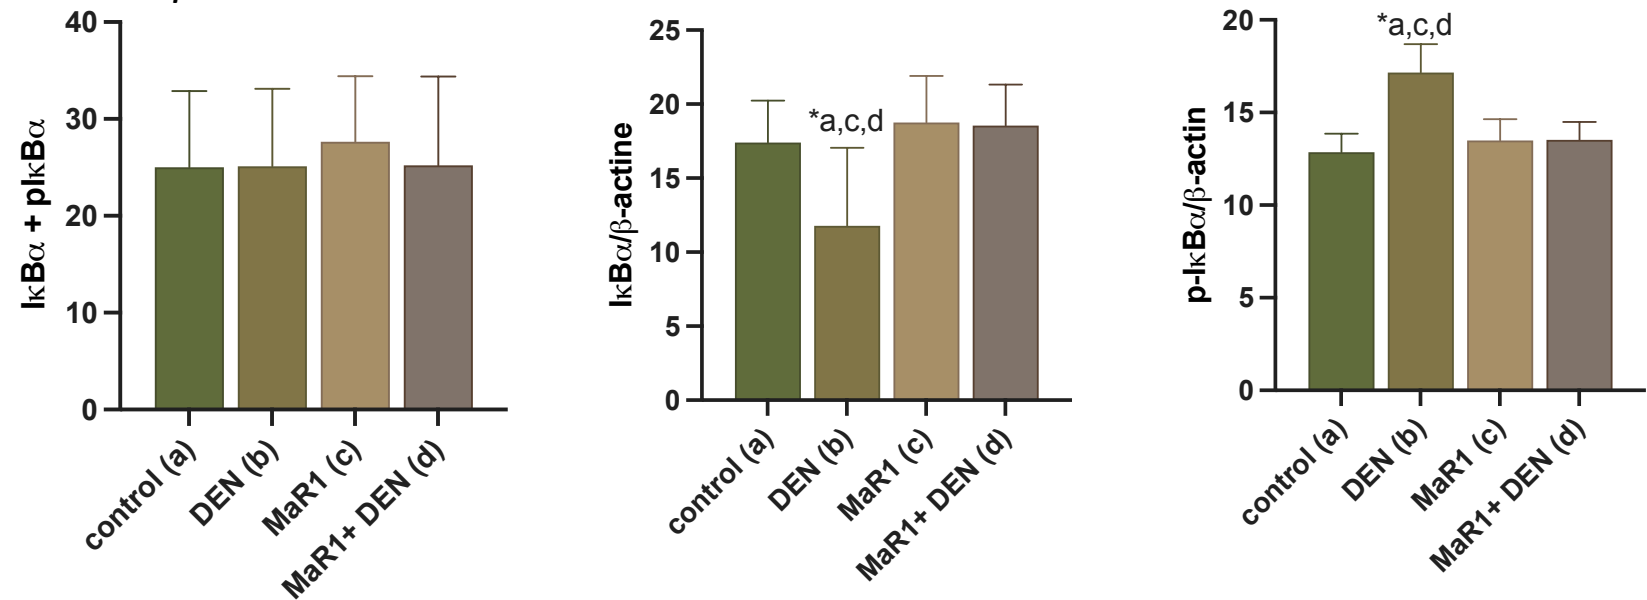

β-actin

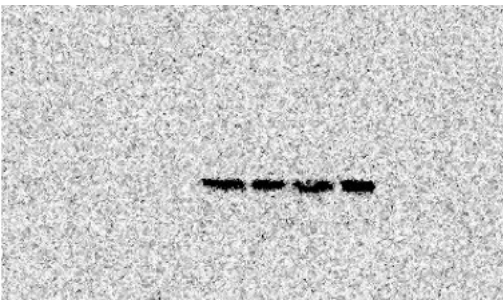

p-IκBα

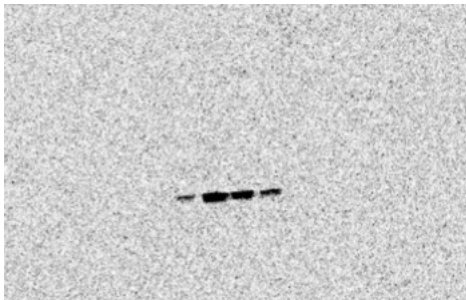

IκBα

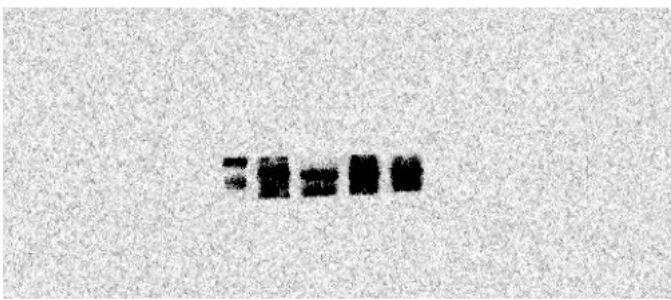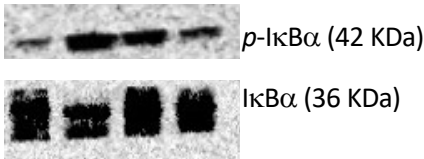



S6: GSH and GSSG liver tissue analysis

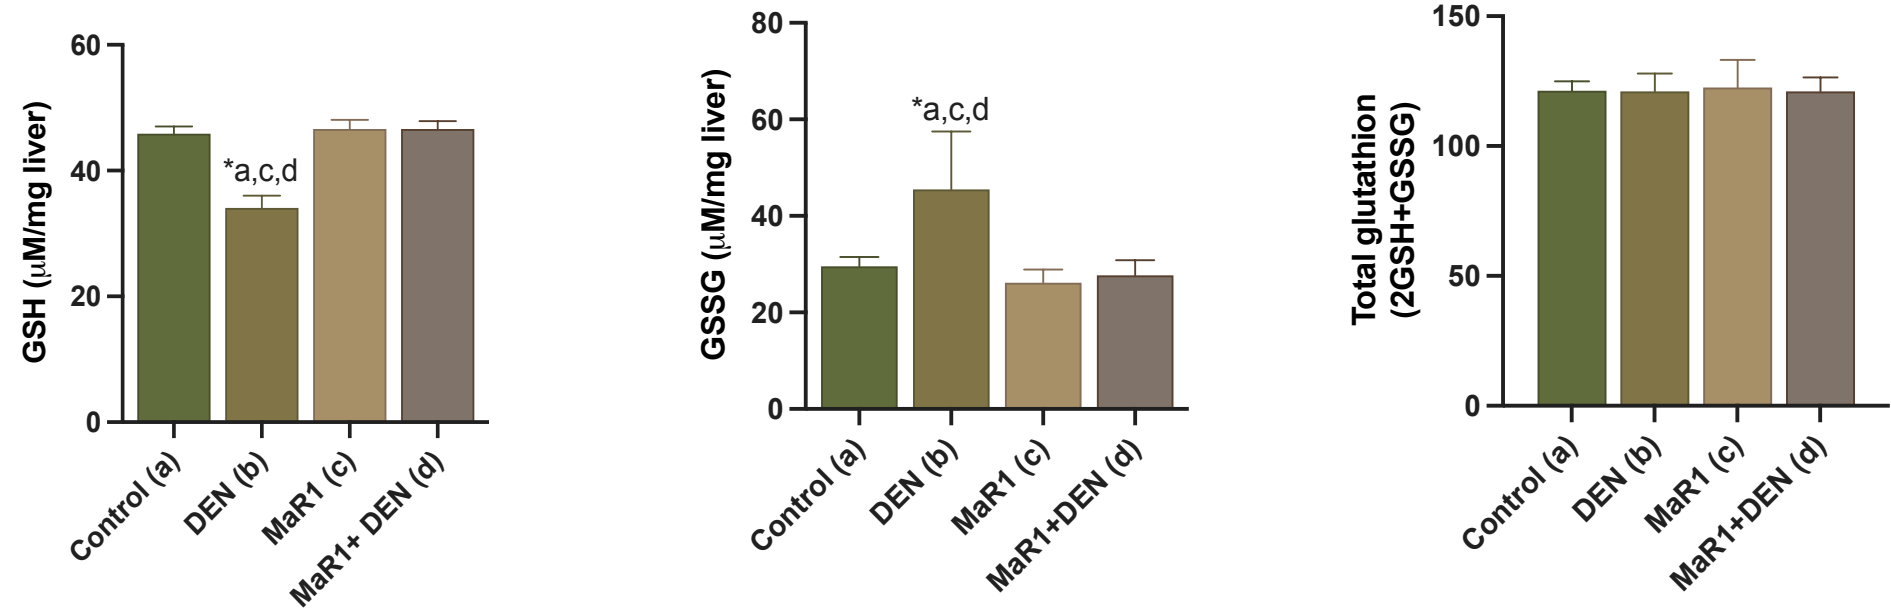

Supplement: s1 [file s1]
